# Supplementary material for: Exploring the Relationship between Biosynthetic Gene Clusters and Constitutive Production of Mycosporine-like Amino Acids in Brazilian Cyanobacteria
Source: MDPI journal article supplement (doi:10.3390/molecules28031420), 2023-02-02
Supplement: s1 [file s1]

**Exploring the relationship between biosynthetic gene clusters and constitutive production of  
mycosporine-like amino acids in Brazilian cyanobacteria**

Rafael B. Dextro

University of São Paulo (USP), Center for Nuclear Energy in Agriculture (CENA), Avenida Centenário  
303, 13416-000 Piracicaba, SP, Brazil

Endreus Delbaje

University of São Paulo (USP), Center for Nuclear Energy in Agriculture (CENA), Avenida Centenário  
303, 13416-000 Piracicaba, SP, Brazil

Vanessa Geraldies

University of São Paulo (USP), School of Pharmaceutical Sciences, Avenida Prof. Lineu Prestes 580,  
05508-000, São Paulo, SP, Brazil

Ernani Pinto

University of São Paulo (USP), Center for Nuclear Energy in Agriculture (CENA), Avenida Centenário  
303, 13416-000 Piracicaba, SP, Brazil

Paul F. Long

University of São Paulo (USP), School of Pharmaceutical Sciences, Avenida Prof. Lineu Prestes 580,  
05508-000, São Paulo, SP, Brazil

Faculty of Life Sciences & Medicine, King's College London, United Kingdom

Marli F. Fiore

University of São Paulo (USP), Center for Nuclear Energy in Agriculture (CENA), Avenida Centenário  
303, 13416-000 Piracicaba, SP, Brazil

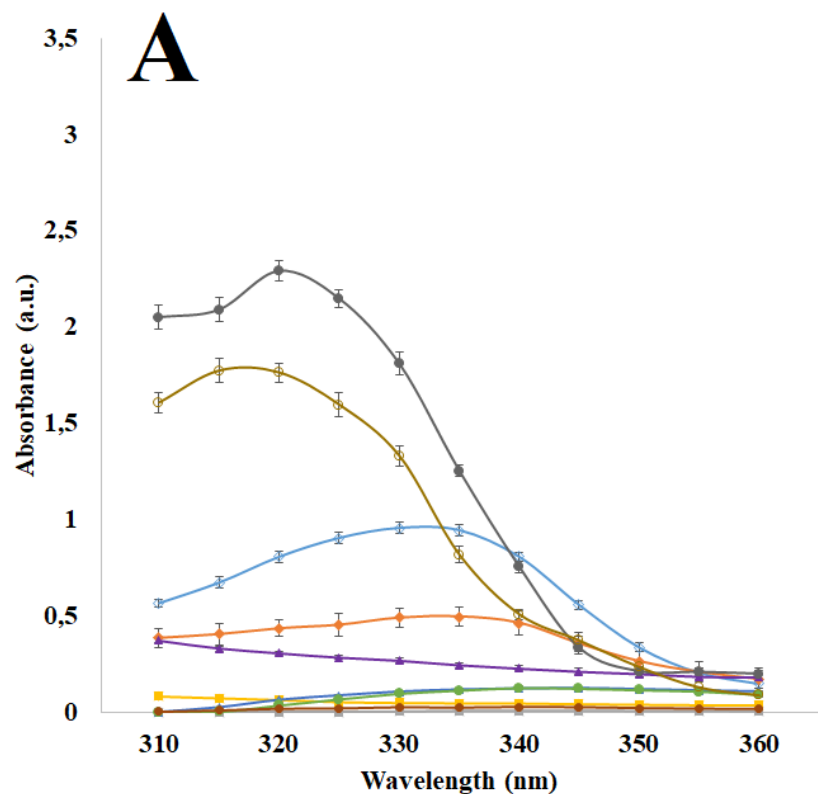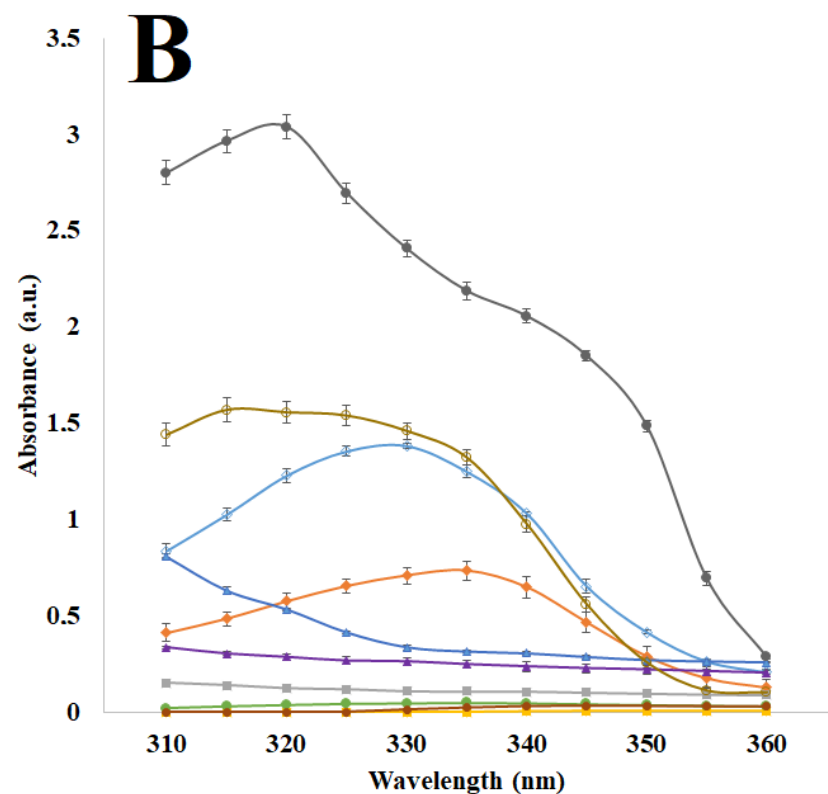

**Figure S1. Absorbance detected on the wavelength of 310 to 360 nm at the cyanobacterial extracts cultivated at fluorescent light (A) and with UV stimulus (B). Strains tags: ● UFV-OR1; ○ CENA114; ◇ ITEP-024; ◆ CENA596; ● CENA516; ● CCIBt3563; ■ CENA597; ■ CENA650; ▲ CENA526; ▲ CENA528.**

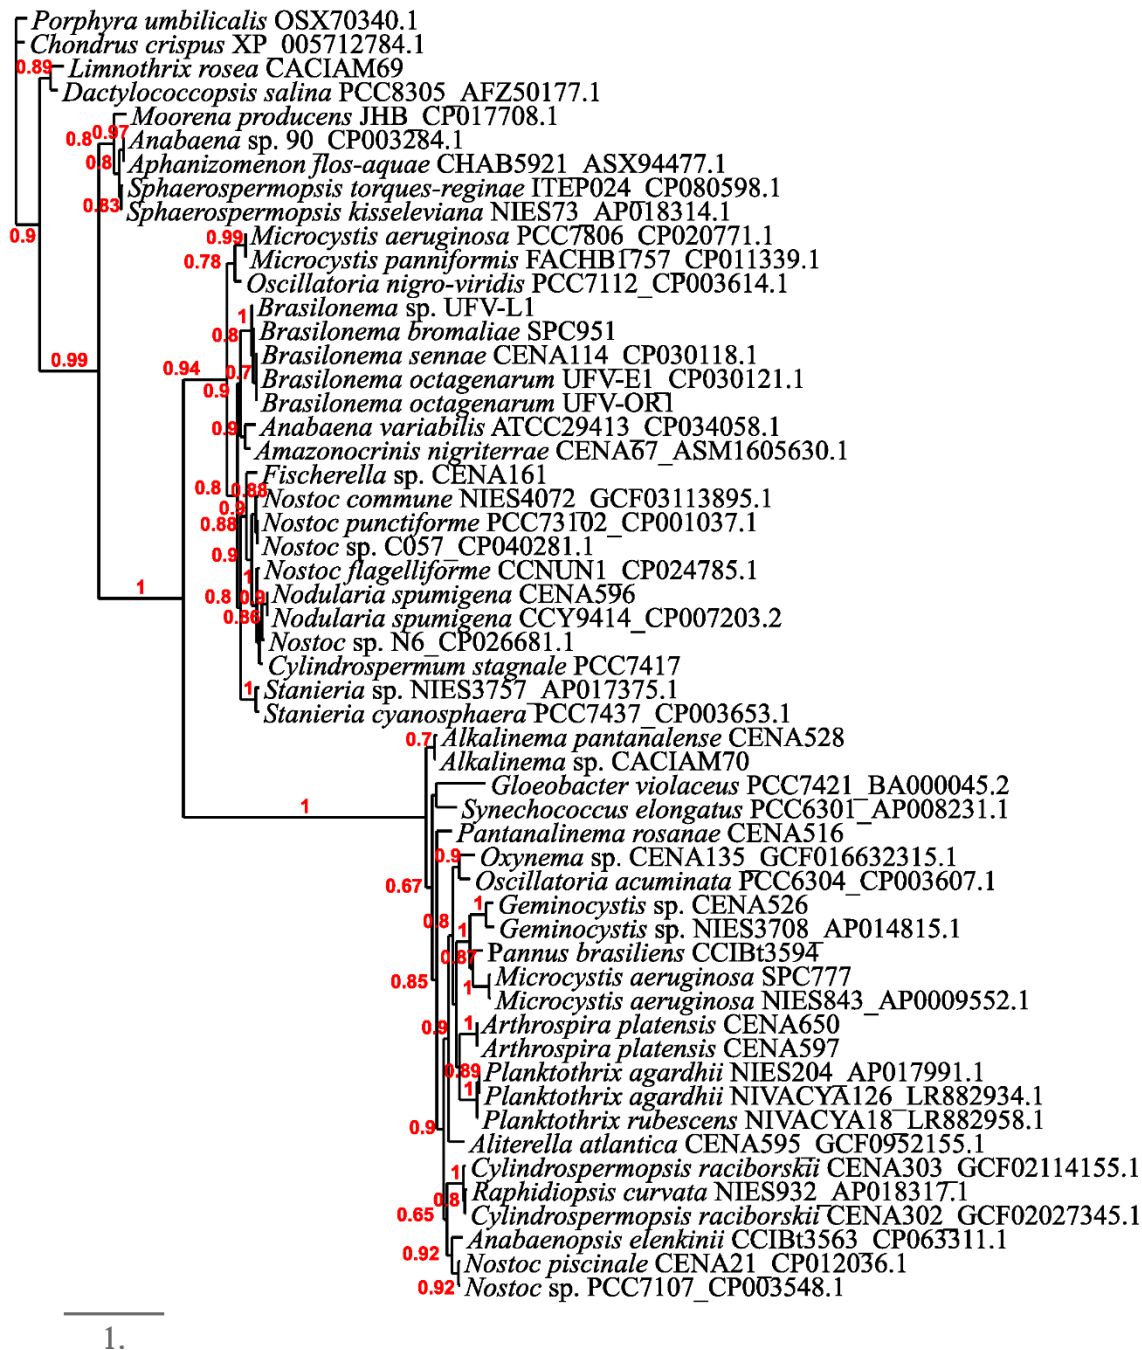

Figure S2. Maximum likelihood phylogeny tree of the gene encoding for 3-dehydroquinate synthase showing the evolutionary relationship of each gene's copy from cyanobacteria, other bacteria (*Dactylococcopsis salina* PCC8305) and red algae (*Porphyra umbilicalis* and *Chondrus crispus*)

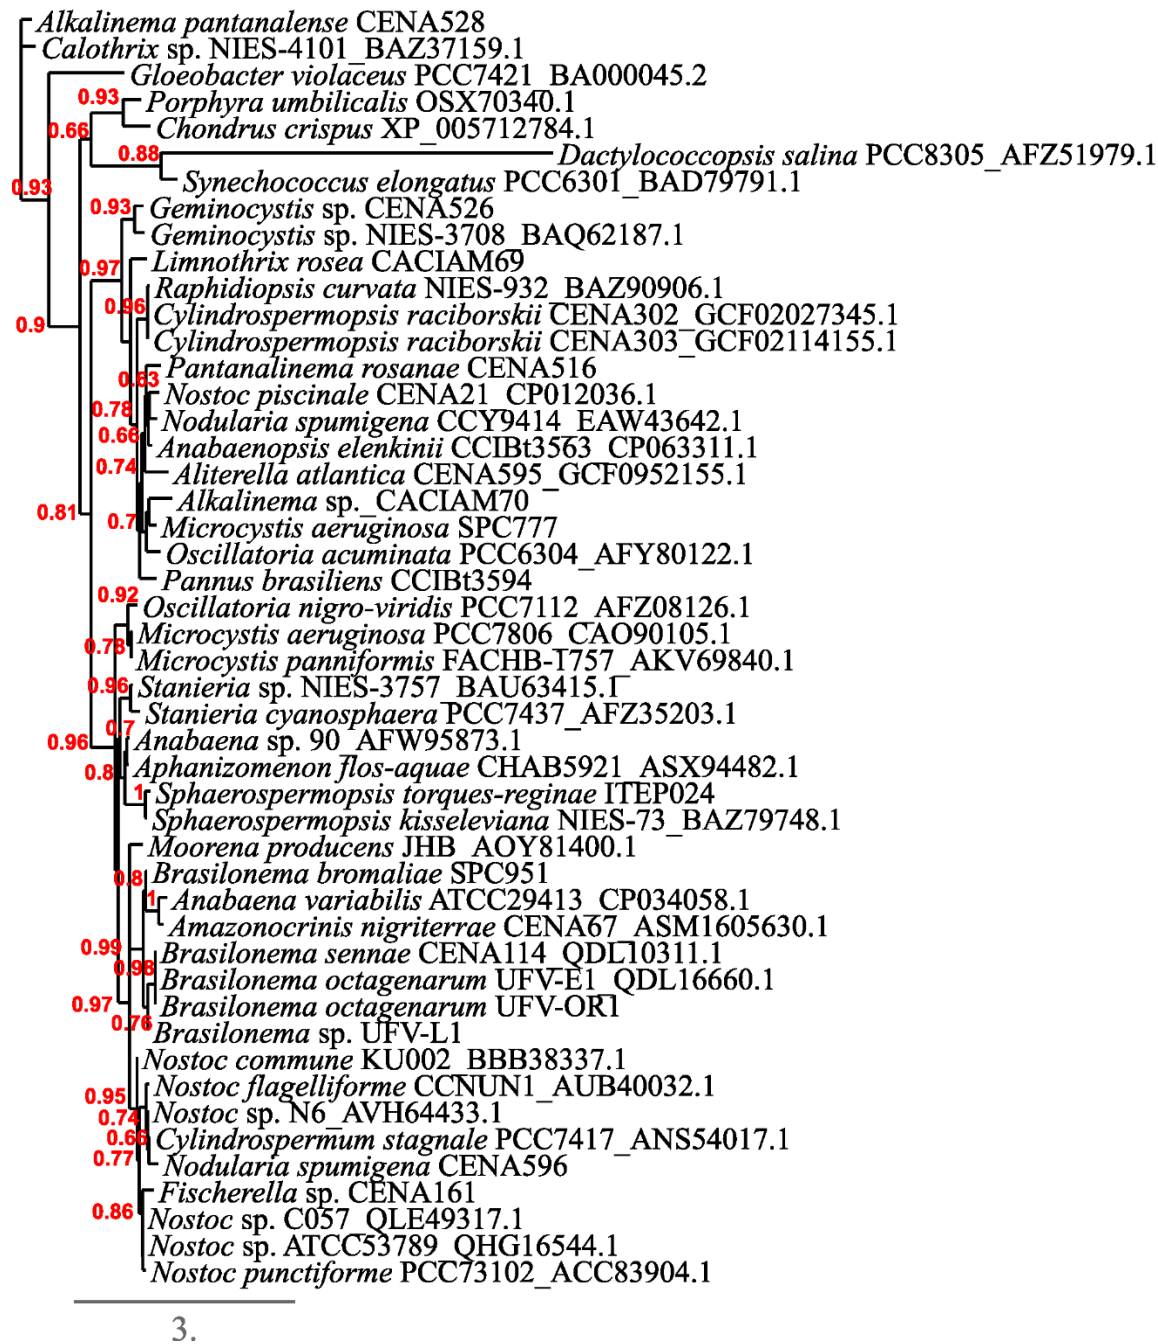

Figure S3. Maximum likelihood phylogeny tree of the gene encoding for *O*-methyltransferase showing the evolutionary relationship of each gene's copy from cyanobacteria, other bacteria (*Dactylococcopsis salina* PCC8305) and red algae (*Porphyra umbilicalis* and *Chondrus crispus*)

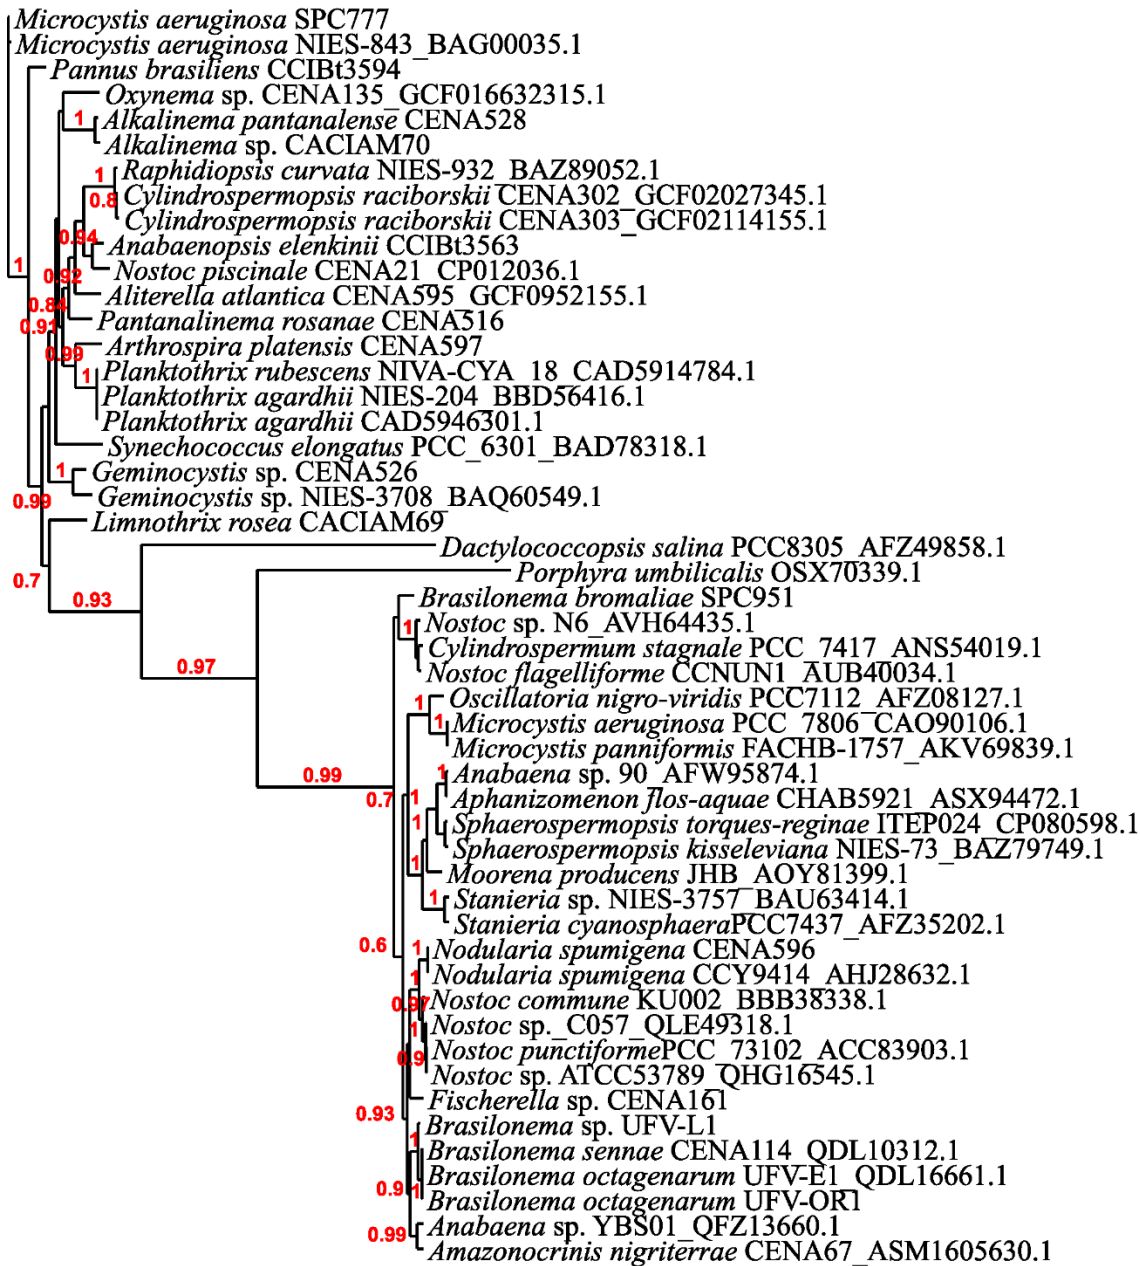

2.

Figure S4. Maximum likelihood phylogeny tree of the gene encoding for ATP-grasp showing the evolutionary relationship of each gene's copy from cyanobacteria, other bacteria (*Dactylococcopsis salina* PCC8305) and red algae (*Porphyra umbilicalis*)

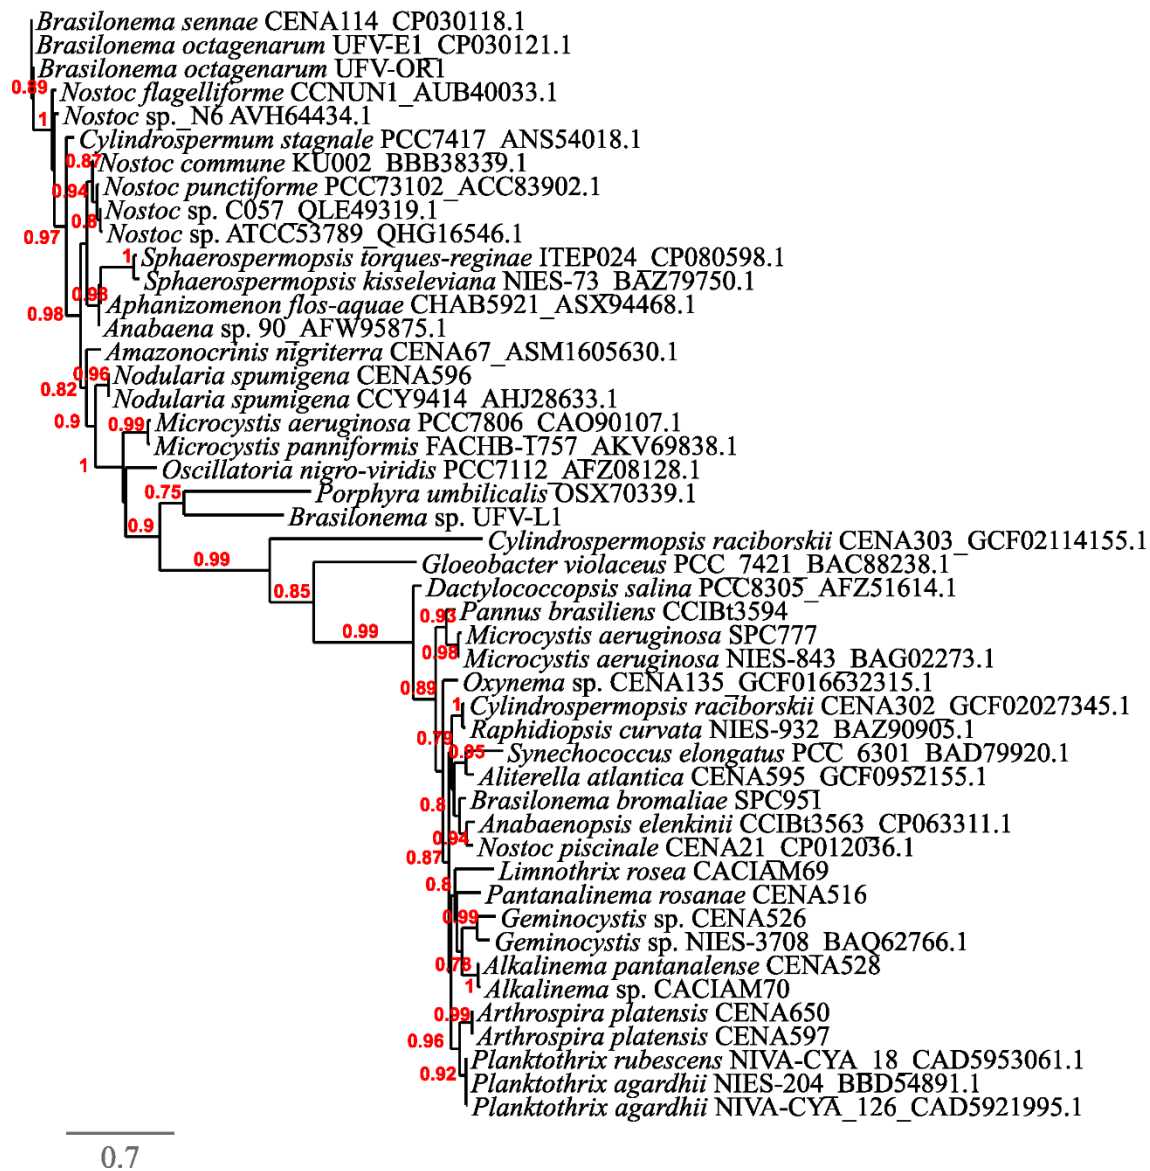

Figure S5. Maximum likelihood phylogeny tree of the gene encoding for d-Ala d-Ala ligase showing the evolutionary relationship of each gene's copy from cyanobacteria, other bacteria (*Dactylococcopsis salina* PCC8305) and red algae (*Porphyra umbilicalis*)



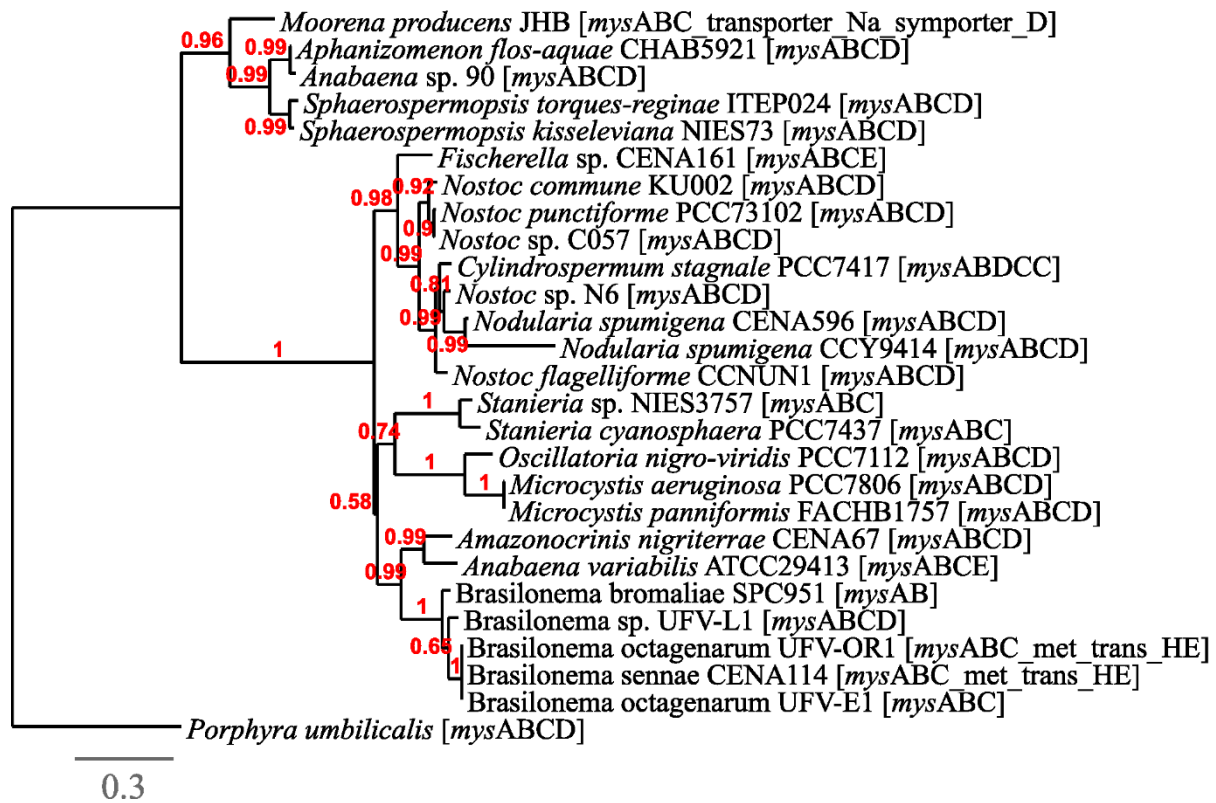

**Figure S6.** Maximum likelihood phylogeny tree of the MAA-related gene cluster found in the selected cyanobacterial strains that contained colinear copies of the *mys* genes and a red alga (*Porphyra umbilicalis*) showing the evolutionary relationship between each cluster. The gene composition of each strains' cluster is displayed between brackets.





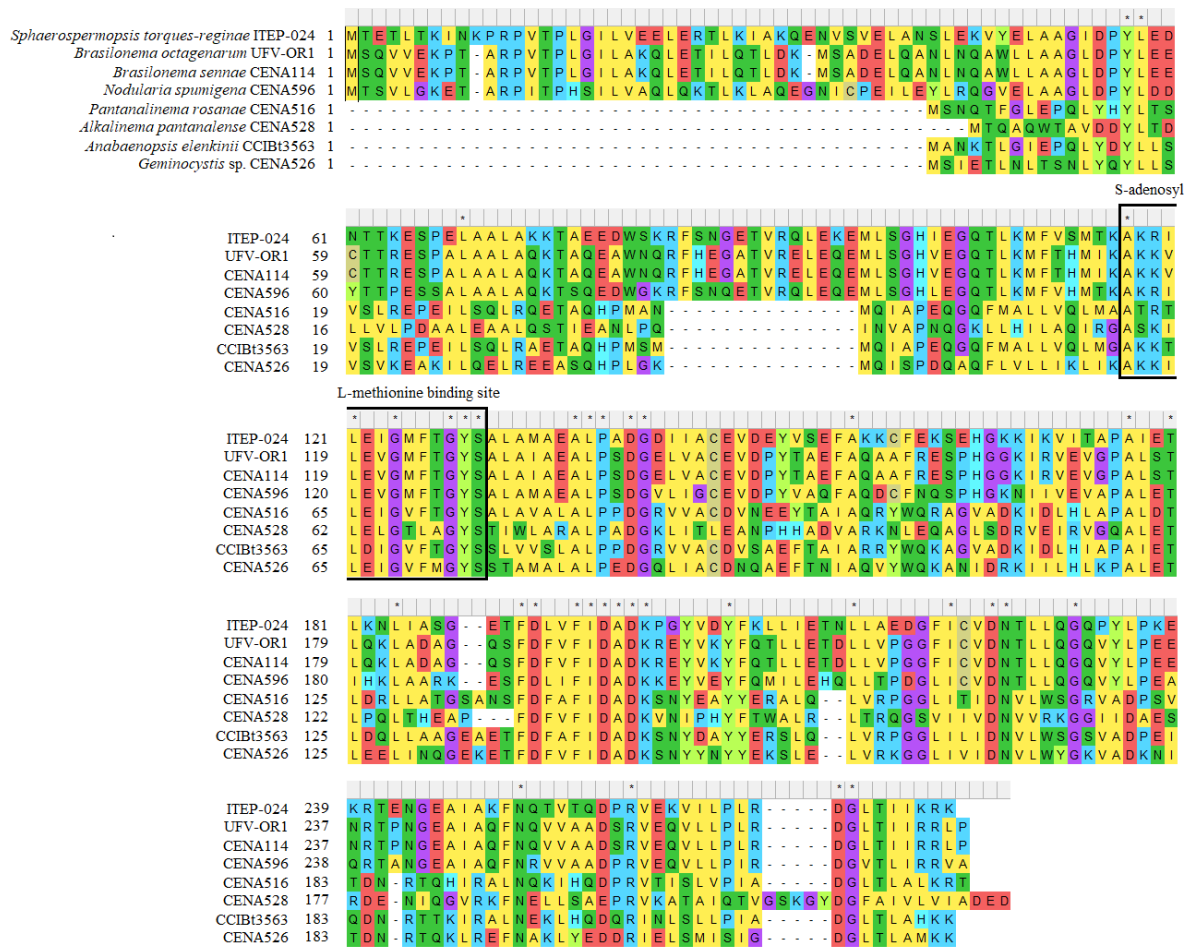

**Figure S8.** Comparison of the aligned deduced amino acid sequences of *O*-methyltransferase from the ten strains used. Alignment performed in ClustalW. The (\*) above each column represents the conserved amino acid positions, whereas the conservative substitutions are represented by the same colour scheme. The S-adenosyl L-methionine binding site is boxed.

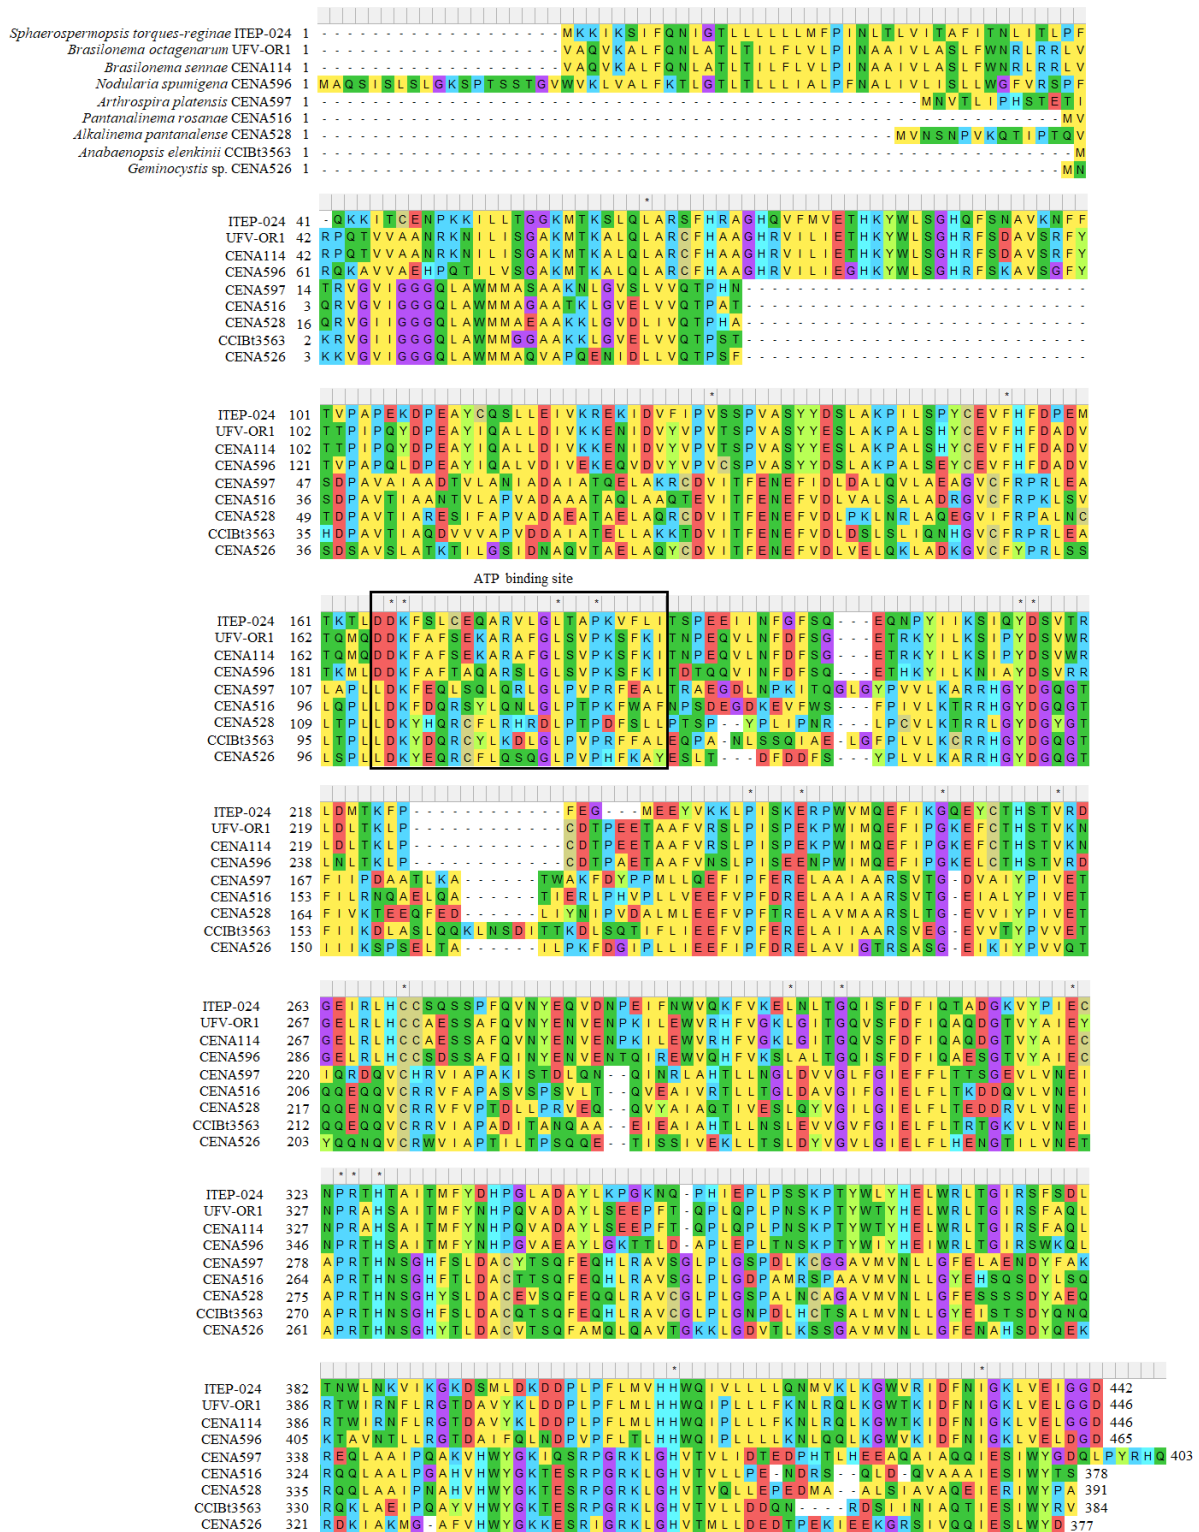

**Figure S9. Comparison of the aligned deduced amino acid sequences of ATP-grasp from the ten strains used. Alignment performed in ClustalW. The (\*) above each column represents the**

**conserved amino acid positions, whereas the conservative substitutions are represented by the same colour scheme. The ATP binding site is boxed.**

[illegible][illegible][illegible]

ATP binding site

[illegible][illegible]

|          |     |                                                                |
|----------|-----|----------------------------------------------------------------|
| ITEP-024 | 276 | KCHQALGCRHYSLDFDR-IDPNGEPYFLAAGLYCSFAPKSVIPCKMAKNAGSLDELLEIA   |
| UFV-OR1  | 276 | KCHLALGCRHYSLDFDR-IDPGQPWFLEAGLFCIFDHNNAVACTANKVGIPLDelfo      |
| CENA114  | 276 | KCHLALGCRHYSLDFDR-IDPGQPWFLEAGLFCIFDHNNAVCTANKVGIPLDelfo       |
| CENA596  | 276 | MCHQALGCRHYSLDFDR-IDPGQPWFLEAGLYCSFAPKSVISCAIAIAGVPLNELFMV     |
| CENA597  | 284 | EAFLLAVDAAGLARVDFFYEKTGEVLNIEINTLPGFATLSMYPQLWSATGVSFPELVNQ    |
| CENAg50  | 284 | EAFLLAVDAAGLARVDFFYEKTGEVLNIEINTLPGFATLSMYPQLWSATGV 334        |
| CENA516  | 286 | RAFQAIDGAGLARVDFFYEASQEILVNEINTLPGFATLSMYPQLWEATGVSAELVDQ      |
| CENA528  | 286 | QAFQAIDGAGLTRVDFFYVEATEILVINEVTNLPGFATSMYPQLWATSATGVSDPDLVDR   |
| CCIB3563 | 281 | QAFAAVDGAAGLARVDFFFVEATGEVLNIEINTFPGFATLSMYPQLWAYSATVPFAELVDRL |
| CENA526  | 282 | QAFARAYSGRGLSRVDFFFNPDTEFLFINEINTLPGFATLSMYPQLWEATGVSTOLLDD    |

ITEP-024 335 I K E T L K 338

UFV-OR1 335 I N Q A L G K I 342

CENA114 335 I N Q A L G K N M I F D K L S I 350

CENA596 335 I H E T L S S S N L H F F S C I 350

CENA597 344 I E L A L E R H T Q A A E A P 358

CENA650 344

CENA516 346 L Q F A L E R Q D L P P P 360

CENA528 344 V Q F A L E R S H S 353

CCIB3563 341 I Q L A L E R Y T V K E 352

CENA526 342 V T F A L N 347

AMP binding site

Brasionema octagenarum UFV-OR1 1007  
 Brasionema sennae CENA114 1007  
 Pantanalinema rosanae CENA516 1874  
 Alkalinema pantanalense CENA528 1082  
 Geminocystis sp. CENA526 529

AMP binding site

1058  
 1058  
 1925  
 1133  
 589

1110  
 1110  
 1973  
 1182  
 648

**Table S1. Heat map based on the identity percentage of the protein encoded by the *mysA* gene annotated on each strain used in this study.**

| STRAINS                                              | 1     | 2     | 3     | 4     | 5     | 6     | 7     | 8     | 9   | 10  |
|------------------------------------------------------|-------|-------|-------|-------|-------|-------|-------|-------|-----|-----|
| 1. <i>Sphaerospermopsis torques-reginae</i> ITEP-024 | 100   |       |       |       |       |       |       |       |     |     |
| 2. <i>Nodularia spumigena</i> CENA596                | 39.73 | 100   |       |       |       |       |       |       |     |     |
| 3. <i>Anabaenopsis elenkinii</i> CCIBt3563           | 25.22 | 28.31 | 100   |       |       |       |       |       |     |     |
| 4. <i>Arthrospira platensis</i> CENA597              | 29.67 | 28.41 | 66.12 | 100   |       |       |       |       |     |     |
| 5. <i>Arthrospira platensis</i> CENA650              | 29.67 | 28.41 | 66.12 | 100   | 100   |       |       |       |     |     |
| 6. <i>Geminocystis</i> sp. CENA526                   | 28.14 | 29.48 | 61.33 | 65.56 | 65.56 | 100   |       |       |     |     |
| 7. <i>Alkalinema pantanalense</i> CENA528            | 27.08 | 28.61 | 69.13 | 66.39 | 66.39 | 60.49 | 100   |       |     |     |
| 8. <i>Pantanalinema rosanae</i> CENA516              | 28.01 | 24.65 | 69.25 | 64.54 | 64.54 | 62.64 | 73    | 100   |     |     |
| 9. <i>Brasilonema sennae</i> CENA114                 | 38.21 | 72.3  | 28.98 | 24.71 | 24.71 | 29.07 | 26.98 | 24.86 | 100 |     |
| 10. <i>Brasilonema octagenarum</i> UFV-OR1           | 38.21 | 72.3  | 28.98 | 24.71 | 24.71 | 29.07 | 26.98 | 24.86 | 100 | 100 |

**Table S2. Heat map based on the identity percentage of the protein encoded by the *mysB* gene annotated on each strain used in this study.**

| STRAINS                                              | 1     | 2     | 3     | 4     | 5     | 6     | 7   | 8   |
|------------------------------------------------------|-------|-------|-------|-------|-------|-------|-----|-----|
| 1. <i>Sphaerospermopsis torques-reginae</i> ITEP-024 | 100   |       |       |       |       |       |     |     |
| 2. <i>Nodularia spumigena</i> CENA596                | 64.86 | 100   |       |       |       |       |     |     |
| 3. <i>Anabaenopsis elenkinii</i> CCIBt3563           | 36.05 | 38.29 | 100   |       |       |       |     |     |
| 4. <i>Geminocystis</i> sp. CENA526                   | 39.55 | 35.06 | 60.91 | 100   |       |       |     |     |
| 5. <i>Alkalinema pantanalense</i> CENA528            | 34.18 | 35.85 | 33.16 | 34.05 | 100   |       |     |     |
| 6. <i>Pantanalinema rosanae</i> CENA516              | 39.89 | 40.53 | 78.64 | 56.82 | 33.86 | 100   |     |     |
| 7. <i>Brasilonema sennae</i> CENA114                 | 63.1  | 67.03 | 37.02 | 40.46 | 35.44 | 38.63 | 100 |     |
| 8. <i>Brasilonema octagenarum</i> UFV-OR1            | 63.1  | 67.03 | 37.02 | 40.46 | 35.44 | 38.63 | 100 | 100 |

**Table S3. Heat map based on the identity percentage of the protein encoded by the *mysC* gene annotated on each strain used in this study.**

| STRAINS                                              | 1     | 2     | 3     | 4     | 5     | 6     | 7   | 8     | 9   |
|------------------------------------------------------|-------|-------|-------|-------|-------|-------|-----|-------|-----|
| 1. <i>Sphaerospermopsis torques-reginae</i> ITEP-024 | 100   |       |       |       |       |       |     |       |     |
| 2. <i>Nodularia spumigena</i> CENA596                | 61.41 | 100   |       |       |       |       |     |       |     |
| 3. <i>Anabaenopsis elenkinii</i> CCIBt3563           | 21.94 | 20.99 | 100   |       |       |       |     |       |     |
| 4. <i>Arthrospira platensis</i> CENA597              | 19.92 | 22.32 | 63.92 | 100   |       |       |     |       |     |
| 5. <i>Geminocystis</i> sp. CENA526                   | 26.19 | 22.43 | 54.03 | 56.32 | 100   |       |     |       |     |
| 6. <i>Alkalinema pantanalense</i> CENA528            | 0     | 0     | 60.42 | 58.22 | 53.72 | 100   |     |       |     |
| 7. <i>Pantanalinema rosanae</i> CENA516              | 21.05 | 23.22 | 64.92 | 63.45 | 55.53 | 63.66 | 100 |       |     |
| 8. <i>Brasilonema sennae</i> CENA114                 | 60.31 | 75.28 | 0     | 21.21 | 23.53 | 0     | 0   | 100   |     |
| 9. <i>Brasilonema octagenarum</i> UFV-OR1            | 60.09 | 75.06 | 0     | 21.21 | 23.53 | 0     | 0   | 99.78 | 100 |

**Table S4. Heat map based on the identity percentage of the protein encoded by the *mysD* gene annotated on each strain used in this study.**

| STRAINS                                              | 1     | 2     | 3     | 4     | 5     | 6     | 7     | 8     | 9     | 10  |
|------------------------------------------------------|-------|-------|-------|-------|-------|-------|-------|-------|-------|-----|
| 1. <i>Sphaerospermopsis torques-reginae</i> ITEP-024 | 100   |       |       |       |       |       |       |       |       |     |
| 2. <i>Nodularia spumigena</i> CENA596                | 64.6  | 100   |       |       |       |       |       |       |       |     |
| 3. <i>Anabaenopsis elenkinii</i> CCIBt3563           | 23.5  | 22.68 | 100   |       |       |       |       |       |       |     |
| 4. <i>Arthrospira platensis</i> CENA597              | 24.4  | 23.21 | 71.23 | 100   |       |       |       |       |       |     |
| 5. <i>Arthrospira platensis</i> CENA650              | 24.02 | 23.21 | 71.47 | 100   | 100   |       |       |       |       |     |
| 6. <i>Geminocystis</i> sp. CENA526                   | 24.93 | 23.59 | 64.27 | 63.22 | 64.07 | 100   |       |       |       |     |
| 7. <i>Alkalinema pantanalense</i> CENA528            | 23.37 | 21.3  | 69.14 | 66.38 | 66.57 | 65.04 | 100   |       |       |     |
| 8. <i>Pantanalinema rosanae</i> CENA516              | 23.91 | 25.93 | 69.32 | 65.83 | 66.67 | 62.68 | 69.32 | 100   |       |     |
| 9. <i>Brasilonema sennae</i> CENA114                 | 61.65 | 67.54 | 23.63 | 24.58 | 24.58 | 22.67 | 23.62 | 26.19 | 100   |     |
| 10. <i>Brasilonema octagenarum</i> UFV-OR1           | 61.36 | 68.53 | 22.01 | 24.58 | 24.58 | 23.99 | 21.69 | 26.79 | 98.53 | 100 |

**Table S5. Motif analysis of each gene found on the evaluated strains. The numbers represent the e-value associated to each specific motif followed by their location within the gene in parentheses. (-) represents absence of significant hits for each motif.**

| Strain          | 3-dehydroquinate synthase (PF01761) | O-methyltransferases (PF01596)  | ATP-grasp domain (PF02655 and PF02222) | d-Ala d-alanine ligase (PF07478) | Condensation domain+AMP-binding enzyme and its C-terminal +Phosphopantetheine binding site+Thioesterase domain (PF00668+PF00501+PF13193+PF00550 +PF00975)                   | Dioxygen ases (PF02668)         |
|-----------------|-------------------------------------|---------------------------------|----------------------------------------|----------------------------------|-----------------------------------------------------------------------------------------------------------------------------------------------------------------------------|---------------------------------|
| <b>ITEP-024</b> | 6.9 e <sup>-44</sup> (128...385)    | 3.1 e <sup>-53</sup> (89...276) | 6.5 e <sup>-6</sup> (179...309)        | 5.3 e <sup>-24</sup> (156...334) | -                                                                                                                                                                           | -                               |
| <b>CENA596</b>  | 2.3 e <sup>-55</sup> (86...332)     | 7.0 e <sup>-54</sup> (87...276) | 9.1 e <sup>-5</sup> (186...349)        | 9.8 e <sup>-19</sup> (153...335) | -                                                                                                                                                                           | -                               |
| <b>CENA114</b>  | 1.6 e <sup>-58</sup> (83...331)     | 9.1 e <sup>-54</sup> (87...275) | 7.2 e <sup>-5</sup> (240...330)        | 1.4 e <sup>-17</sup> (152...335) | 3.8 e <sup>-80</sup> (10...470)/ 2.1 e <sup>-107</sup> (491...884)/ 1.4 e <sup>-15</sup> (892...966)/ 5.6 e <sup>-14</sup> (996...1059)/ 3.2 e <sup>-30</sup> (1084...1185) | 7.7 e <sup>-22</sup> (43...357) |
| <b>UFV-OR1</b>  | 1.6 e <sup>-58</sup> (83...331)     | 8.8 e <sup>-53</sup> (87...275) | 0.0002 (240...330)                     | 5.0 e <sup>-18</sup> (152...335) | 3.2 e <sup>-79</sup> (10...470)/ 2.2 e <sup>-107</sup> (491...884)/ 4.6 e <sup>-15</sup> (892...966)/ 5.6 e <sup>-14</sup> (996...1059)/ 1.1 e <sup>-30</sup> (1084...1185) | 9.3 e <sup>-22</sup> (43...357) |
| <b>CENA597</b>  | 2.7 e <sup>-106</sup> (69...329)    | -                               | 1.2 e <sup>-6</sup> (112...281)        | 4.4 e <sup>-78</sup> (139...345) | -                                                                                                                                                                           | -                               |
| <b>CENA650</b>  | 2.7 e <sup>-106</sup> (69...329)    | -                               | -                                      | 4.1 e <sup>-73</sup> (139...334) | -                                                                                                                                                                           | -                               |



|                  |                                  |                                 |                                     |                                     |                                                                                                                                                                                        |   |
|------------------|----------------------------------|---------------------------------|-------------------------------------|-------------------------------------|----------------------------------------------------------------------------------------------------------------------------------------------------------------------------------------|---|
| <b>CCIBt3563</b> | 9.1 e <sup>-107</sup> (69...329) | 4.4 e <sup>-78</sup> (19...219) | 4.6 e <sup>-59</sup><br>(109...284) | 2.2 e <sup>-76</sup><br>(136...342) | -                                                                                                                                                                                      | - |
| <b>CENA528</b>   | 1.1 e <sup>-105</sup> (72...332) | 3.1 e <sup>-45</sup> (24...203) | 9.3 e <sup>-52</sup><br>(127...289) | 3.3 e <sup>-79</sup><br>(140...345) | 2.3 e <sup>-104</sup> (76...527)/ 2.8 e <sup>-10</sup> (702...956)/ 1.2 e <sup>-8</sup> (964...1038)/ 6.9 e <sup>-13</sup> (1071...1134)/ 1.0 e <sup>-18</sup> (1202...1287)           | - |
| <b>CENA516</b>   | 4.5 e <sup>-107</sup> (70...330) | 3.1 e <sup>-81</sup> (19...219) | 0.0012<br>(101...267)               | 1.4 e <sup>-77</sup><br>(141...347) | 9.8 e <sup>-111</sup> (884...1327)/ *6.0 e <sup>-101</sup> (1384...1749)/ *5.8 e <sup>-10</sup> (1757...1832)/ *2.8 e <sup>-13</sup> (1862...1923)/ 2.1 e <sup>-19</sup> (1958...2193) | - |
| <b>CENA526</b>   | 4.7 e <sup>-107</sup> (70...329) | 1.3 e <sup>-79</sup> (19...219) | 1.1 e <sup>-55</sup><br>(110...275) | 2.8 e <sup>-77</sup><br>(137...343) | - / 7.2 e <sup>-85</sup> (10...404)/ 1.2 e <sup>-7</sup> (412...489)/ 6.0 e <sup>-11</sup> (518...578)/ -                                                                              | - |

\*CENA516 has a duplication on three motifs of NPRS-like complex (PF00501 in 289...686; PF13193 in 695...768; PF00550 in 800...862)

**Table S6. Information concerning the encoding enzymes of the annotated genes of each strains used in this study.**

| Strain          | Gene        | Amino Acids (aa) | Proposed Function         | Function of closest sequence     | Most similar organism                 | Similarity (%) | Accession Number                      |
|-----------------|-------------|------------------|---------------------------|----------------------------------|---------------------------------------|----------------|---------------------------------------|
| <b>ITEP-024</b> | <i>mysA</i> | 454              | 3-dehydroquinate synthase | 3-dehydroquinate synthase        | <i>Sphaerospermopsis reniformis</i>   | 96.92          | QKX45747<br>(Geraldes et al. 2020)    |
| <b>ITEP-024</b> | <i>mysB</i> | 277              | Methyltransferase         | SAM-dependent methyltransferase  | <i>Sphaerospermopsis kisseleviana</i> | 93.50          | QKX45748<br>(Geraldes et al. 2020)    |
| <b>ITEP-024</b> | <i>mysC</i> | 423              | ATP-grasp ligase          | ATP-grasp domain protein         | <i>Sphaerospermopsis kisseleviana</i> | 94.56          | QKX45749<br>(Geraldes et al. 2020)    |
| <b>ITEP-024</b> | <i>mysD</i> | 340              | d-Alanine ligase          | d-Alanine d-Alanine ligase       | <i>Sphaerospermopsis kisseleviana</i> | 92.94          | QKX45750<br>(Geraldes et al. 2020)    |
| <b>CENA596</b>  | <i>mysA</i> | 409              | 3-dehydroquinate synthase | 3-dehydroquinate synthase        | <i>Nodularia spumigena</i> CCY9414    | 99.27          | WP_063871916.1<br>(Popin et al. 2016) |
| <b>CENA596</b>  | <i>mysB</i> | 277              | Methyltransferase         | Caffeoyl-CoA O-methyltransferase | <i>Nodularia spumigena</i> CCY9414    | 97.47          | WP_063871917.1<br>(Popin et al. 2016) |
| <b>CENA596</b>  | <i>mysC</i> | 465              | ATP-grasp ligase          | ATP-grasp domain protein         | <i>Nodularia spumigena</i> CCY9414    | 92.47          | WP_063871918.1<br>(Popin et al. 2016) |

|                |             |      |                              |                                                                                      |                                             |        |                                       |
|----------------|-------------|------|------------------------------|--------------------------------------------------------------------------------------|---------------------------------------------|--------|---------------------------------------|
| <b>CENA596</b> | <i>mysD</i> | 350  | d-Alanine ligase             | d-Alanine d-Alanine<br>ligase                                                        | <i>Nodularia<br/>spumigena</i><br>CCY9414   | 96.00  | WP_063871919.1<br>(Popin et al. 2016) |
| <b>CENA597</b> | -           | 365  | 3-dehydroquinate<br>synthase | 3-dehydroquinate<br>synthase                                                         | <i>Arthrospira<br/>platensis</i> YZ         | 95.34  | -                                     |
| <b>CENA597</b> | -           | 403  | ATP-grasp ligase             | Phosphoribosyl<br>aminoimidazole<br>carboxylase (PurK –<br>ATP-grasp<br>superfamily) | <i>Arthrospira<br/>platensis</i> YZ         | 100.00 | -                                     |
| <b>CENA597</b> | -           | 358  | d-Alanine ligase             | d-Alanine d-Alanine<br>ligase                                                        | <i>Arthrospira<br/>platensis</i> YZ         | 100.00 | -                                     |
| <b>CENA650</b> | -           | 365  | 3-dehydroquinate<br>synthase | 3-dehydroquinate<br>synthase                                                         | <i>Arthrospira<br/>platensis</i> YZ         | 95.34  | -                                     |
| <b>CENA650</b> | -           | 334  | d-Alanine ligase             | d-Alanine d-Alanine<br>ligase                                                        | <i>Arthrospira<br/>platensis</i> YZ         | 100.00 | -                                     |
| <b>CENA516</b> | -           | 369  | 3-dehydroquinate<br>synthase | 3-dehydroquinate<br>synthase                                                         | <i>Nostoc</i> sp.<br>TCL240-02              | 76.73  | -                                     |
| <b>CENA516</b> | -           | 221  | Methyltransferase            | SAM-dependent<br>methyltransferase                                                   | <i>Tolypothrix</i> sp.<br>PCC 7910          | 80.37  | -                                     |
| <b>CENA516</b> | -           | 378  | ATP-grasp ligase             | phosphoribosyl<br>aminoimidazole<br>carboxylase (PurK –<br>ATP-grasp<br>superfamily) | <i>Nostoc</i> sp. NIES-<br>2111             | 63.42  | -                                     |
| <b>CENA516</b> | -           | 360  | d-Alanine ligase             | d-Alanine d-Alanine<br>ligase                                                        | <i>Calothrix<br/>brevissima</i> NIES-<br>22 | 71.31  | -                                     |
| <b>CENA516</b> | -           | 2202 | NRPS-like                    | Non-ribosomal<br>peptide<br>synthase/polyketide<br>synthase                          | <i>Nostoc</i> sp. UHCC<br>0702              | 45.21  | -                                     |
| <b>CENA528</b> | -           | 366  | 3-dehydroquinate<br>synthase | 3-dehydroquinate<br>synthase (AroB)                                                  | <i>Leptolyngbya</i> sp.<br>NIES-3755        | 73.91  | -                                     |
| <b>CENA528</b> | -           | 223  | Methyltransferase            | O-methyltransferase<br>family protein                                                | <i>Calothrix</i> sp. NIES-<br>4101          | 79.73  | -                                     |

|                  |   |      |                           |                                                                           |                                          |       |   |
|------------------|---|------|---------------------------|---------------------------------------------------------------------------|------------------------------------------|-------|---|
| <b>CENA528</b>   | - | 391  | ATP-grasp ligase          | 5-(carboxyamino)imidazole ribonucleotide synthase (ATP-grasp superfamily) | <i>Nostoc</i> sp. ATCC 53789             | 62.27 | - |
| <b>CENA528</b>   | - | 353  | d-Alanine ligase          | d-Alanine d-Alanine ligase                                                | <i>Crocospaera subtropica</i> ATCC 51142 | 75.14 | - |
| <b>CENA528</b>   | - | 1415 | NRPS-like                 | Non-ribosomal peptide synthetase                                          | <i>Nostoc</i> sp. CENA543                | 44.32 | - |
| <b>CCIBt3594</b> | - | 363  | 3-dehydroquinate synthase | 3-dehydroquinate synthase                                                 | <i>Nodularia spumigena</i> CCY9414       | 87.10 | - |
| <b>CCIBt3594</b> | - | 220  | Methyltransferase         | <i>O</i> -methyltransferase                                               | <i>Nodularia spumigena</i> CCY9414       | 91.36 | - |
| <b>CCIBt3594</b> | - | 384  | ATP-grasp ligase          | N5-carboxyaminoimidazole ribonucleotide synthase (ATP-grasp superfamily)  | <i>Nodularia sphaerocarpa</i> UHCC 0038  | 84.29 | - |
| <b>CCIBt3594</b> | - | 352  | d-Alanine ligase          | d-Alanine d-Alanine ligase                                                | <i>Nodularia spumigena</i> CCY9414       | 86.65 | - |
| <b>CENA526</b>   | - | 363  | 3-dehydroquinate synthase | 3-dehydroquinate synthase                                                 | <i>Geminocystis</i> sp. NIES-3709        | 80.56 | - |
| <b>CENA526</b>   | - | 220  | Methyltransferase         | <i>O</i> -methyltransferase                                               | <i>Geminocystis</i> sp. NIES-3709        | 76.36 | - |
| <b>CENA526</b>   | - | 377  | ATP-grasp ligase          | Phosphoribosyl aminoimidazole carboxylase (PurK – ATP-grasp superfamily)  | <i>Geminocystis</i> sp. NIES-3709        | 81.43 | - |
| <b>CENA526</b>   | - | 347  | d-Alanine ligase          | d-Alanine d-Alanine ligase                                                | <i>Geminocystis</i> sp. NIES-3709        | 84.15 | - |

|                |             |      |                           |                                       |                                       |        |                                        |
|----------------|-------------|------|---------------------------|---------------------------------------|---------------------------------------|--------|----------------------------------------|
| <b>CENA526</b> | -           | 973  | NRPS-like                 | Malonyl CoA-acyl carrier protein      | <i>Geminocystis</i> sp. NIES-3709     | 71.44  | -                                      |
| <b>CENA114</b> | <i>mysA</i> | 411  | 3-dehydroquinate synthase | 3-dehydroquinate synthase             | <i>Brasilonema octagenarum</i> UFV-E1 | 100.00 | CP030118.1 (Alvarenga et al. 2020)     |
| <b>CENA114</b> | <i>mysB</i> | 276  | Methyltransferase         | SAM-dependent methyltransferase       | <i>Brasilonema octagenarum</i> UFV-E1 | 95.29  | CP030118.1 (Alvarenga et al. 2020)     |
| <b>CENA114</b> | <i>mysC</i> | 446  | ATP-grasp ligase          | ATP-grasp enzyme                      | <i>Brasilonema octagenarum</i> UFV-E1 | 100.00 | CP030118.1 (Alvarenga et al. 2020)     |
| <b>CENA114</b> | <i>mysD</i> | 350  | d-Alanine ligase          | d-Alanine d-Alanine ligase            | <i>Brasilonema octagenarum</i> UFV-E1 | 97.14  | CP030118.1 (Alvarenga et al. 2020)     |
| <b>CENA114</b> | <i>mysE</i> | 1340 | NRPS-like                 | Amino acid adenylation domain protein | <i>Brasilonema octagenarum</i> UFV-E1 | 97.24  | CP030118.1 (Alvarenga et al. 2020)     |
| <b>CENA114</b> | <i>mysH</i> | 387  | Dioxygenase               | TfdA family catabolism dioxygenase    | <i>Brasilonema octagenarum</i> UFV-E1 | 99.91  | CP030118.1 (Alvarenga et al. 2020)     |
| <b>UFV-OR1</b> | <i>mysA</i> | 411  | 3-dehydroquinate synthase | 3-dehydroquinate synthase             | <i>Brasilonema octagenarum</i> UFV-E1 | 100.00 | QMEC01000014.1 (Alvarenga et al. 2020) |
| <b>UFV-OR1</b> | <i>mysB</i> | 276  | Methyltransferase         | SAM-dependent methyltransferase       | <i>Brasilonema octagenarum</i> UFV-E1 | 95.29  | QMEC01000014.1 (Alvarenga et al. 2020) |
| <b>UFV-OR1</b> | <i>mysC</i> | 446  | ATP-grasp ligase          | ATP-grasp enzyme                      | <i>Brasilonema octagenarum</i> UFV-E1 | 99.78  | QMEC01000014.1 (Alvarenga et al. 2020) |
| <b>UFV-OR1</b> | <i>mysD</i> | 342  | d-Alanine ligase          | d-Alanine d-Alanine ligase            | <i>Brasilonema octagenarum</i> UFV-E1 | 95.60  | QMEC01000014.1 (Alvarenga et al. 2020) |
| <b>UFV-OR1</b> | <i>mysE</i> | 1340 | NRPS-like                 | Amino acid adenylation domain protein | <i>Brasilonema octagenarum</i> UFV-E1 | 96.64  | QMEC01000014.1 (Alvarenga et al. 2020) |

|                |             |     |             |                                          |                                                     |       |                                              |
|----------------|-------------|-----|-------------|------------------------------------------|-----------------------------------------------------|-------|----------------------------------------------|
| <b>UFV-OR1</b> | <i>mysH</i> | 387 | Dioxygenase | TfdA family<br>catabolism<br>dioxygenase | <i>Brasilonema</i><br><i>octagenarum</i> UFV-<br>E1 | 99.91 | QMEC01000014.1<br>(Alvarenga et al.<br>2020) |
|----------------|-------------|-----|-------------|------------------------------------------|-----------------------------------------------------|-------|----------------------------------------------|

---

**Table S7. Concentration of total carotenoids calculated in each cyanobacterial strain according to experimental group (fluorescent light and UV-exposed) presented in mg L<sup>-1</sup>. (\*) indicates significant statistical difference between conditions by ANOVA test (p < 0.005)**

| Strain                                            | Day 45<br>(control/without UV) | Day 45 (72h UV-<br>exposure) |
|---------------------------------------------------|--------------------------------|------------------------------|
| <i>Sphaerospermopsis torques-reginae</i> ITEP-024 | 0.71 ± 0.01*                   | 0.30 ± 0.10*                 |
| <i>Nodularia spumigena</i> CENA596                | 0.56 ± 0.02*                   | 0.22 ± 0.04*                 |
| <i>Brasilonema sennae</i> CENA114                 | 0.53 ± 0.09                    | 0.52 ± 0.002                 |
| <i>Brasilonema octagenarum</i> UFV-OR1            | 0.51 ± 0.03                    | 0.52 ± 0.04                  |
| <i>Arthrospira platensis</i> CENA597              | 0.43 ± 0.02*                   | 0.28 ± 0.04*                 |
| <i>Arthrospira platensis</i> CENA650              | 0.42 ± 0.04*                   | 0.35 ± 0.01*                 |
| <i>Anabaenopsis elenkinii</i> CCIBt3563           | 0.79 ± 0.08                    | 0.71 ± 0.06                  |
| <i>Alkalinema pantanalense</i> CENA528            | 0.79 ± 0.08                    | 0.85 ± 0.07                  |
| <i>Pantanalinema rosanae</i> CENA516              | 0.86 ± 0.06                    | 0.72 ± 0.08                  |
| <i>Geminocystis</i> sp. CENA526                   | 0.52 ± 0.02*                   | 0.70 ± 0.03*                 |

**Table S8. Culture media nutritional comparison.**

| Component                                                                                         | Z8 (g L <sup>-1</sup> ) | BG-11 (g L <sup>-1</sup> ) | ASM-1 (g L <sup>-1</sup> ) |
|---------------------------------------------------------------------------------------------------|-------------------------|----------------------------|----------------------------|
| NaNO <sub>3</sub>                                                                                 | 4.6 × 10 <sup>-1</sup>  | 1.5                        | 1.0 × 10 <sup>-2</sup>     |
| Ca(NO <sub>3</sub> ) <sub>2</sub>                                                                 | 6.0 × 10 <sup>-2</sup>  | -                          | -                          |
| CaCl <sub>2</sub>                                                                                 | -                       | 3.6 × 10 <sup>-2</sup>     | 3.0 × 10 <sup>-5</sup>     |
| MgSO <sub>4</sub>                                                                                 | 2.5 × 10 <sup>-2</sup>  | 7.5 × 10 <sup>-2</sup>     | 5.0 × 10 <sup>-5</sup>     |
| K <sub>2</sub> HPO <sub>4</sub>                                                                   | 3.1 × 10 <sup>-2</sup>  | 4.0 × 10 <sup>-2</sup>     | 1.7 × 10 <sup>-5</sup>     |
| Na <sub>2</sub> CO <sub>3</sub>                                                                   | 2.1 × 10 <sup>-2</sup>  | 2.0 × 10 <sup>-2</sup>     | -                          |
| Na <sub>2</sub> HPO <sub>4</sub>                                                                  | -                       | -                          | 2.7 × 10 <sup>-5</sup>     |
| EDTA Na <sub>2</sub>                                                                              | 4.3 × 10 <sup>-3</sup>  | 1.0 × 10 <sup>-3</sup>     | 7.4 × 10 <sup>-6</sup>     |
| FeCl <sub>3</sub>                                                                                 | 3.1 × 10 <sup>-3</sup>  | -                          | 1.1 × 10 <sup>-6</sup>     |
| (NH <sub>4</sub> ) <sub>5</sub> [Fe(C <sub>6</sub> H <sub>4</sub> O <sub>7</sub> ) <sub>2</sub> ] | -                       | 6.0 × 10 <sup>-3</sup>     | -                          |
| C <sub>6</sub> H <sub>8</sub> O <sub>7</sub>                                                      | -                       | 6.0 × 10 <sup>-3</sup>     | -                          |
| CoNO <sub>3</sub>                                                                                 | 1.5 × 10 <sup>-5</sup>  | 5.0 × 10 <sup>-5</sup>     | -                          |
| CoCl <sub>2</sub>                                                                                 | -                       | -                          | 2.0 × 10 <sup>-8</sup>     |
| CuSO <sub>4</sub>                                                                                 | 1.2 × 10 <sup>-5</sup>  | 8.0 × 10 <sup>-5</sup>     | -                          |
| CuCl <sub>2</sub>                                                                                 | -                       | -                          | 1.4 × 10 <sup>-9</sup>     |
| MnSO <sub>4</sub>                                                                                 | 1.3 × 10 <sup>-3</sup>  | -                          | -                          |
| MnCl <sub>2</sub>                                                                                 | -                       | 1.8 × 10 <sup>-3</sup>     | 1.4 × 10 <sup>-6</sup>     |
| H <sub>3</sub> BO <sub>3</sub>                                                                    | 3.1 × 10 <sup>-3</sup>  | -                          | 2.5 × 10 <sup>-6</sup>     |
| H <sub>2</sub> BO <sub>4</sub>                                                                    | -                       | 2.9 × 10 <sup>-3</sup>     | -                          |
| ZnSO <sub>4</sub>                                                                                 | 2.9 × 10 <sup>-5</sup>  | 2.2 × 10 <sup>-4</sup>     | -                          |
| ZnCl <sub>2</sub>                                                                                 | -                       | -                          | 3.4 × 10 <sup>-7</sup>     |
| KBr                                                                                               | 1.2 × 10 <sup>-5</sup>  | -                          | -                          |
| KI                                                                                                | 8.3 × 10 <sup>-6</sup>  | -                          | -                          |
| CdNO <sub>3</sub>                                                                                 | 1.5 × 10 <sup>-5</sup>  | -                          | -                          |
| NiSO <sub>4</sub>                                                                                 | 2.0 × 10 <sup>-5</sup>  | -                          | -                          |
| CrNO <sub>3</sub>                                                                                 | 4.1 × 10 <sup>-5</sup>  | -                          | -                          |

(-) indicates that the specific component is absent in the culture media
